# Supplementary material
Source: MDPI journal article supplement (https://www.mdpi.com/1996-1073/16/14/5404)
Supplement: s1 [file s1 › energies-2500842-supplementary.pdf]

# Supporting Information

## Enhanced Photocatalytic CO<sub>2</sub> Reduction to CH<sub>4</sub> Using Novel Ternary Photocatalyst RGO/Au-TNTAs

Md. Arif Hossen <sup>1,2</sup>, Fatema Khatun <sup>1</sup>, Riyadh Ramadhan Ikreedeeh <sup>3,4</sup>, Aamina Din Muhammad <sup>1</sup>, Azrina Abd Aziz <sup>1,\*</sup>, Kah Hon Leong <sup>5,\*</sup>, Lan Ching Sim <sup>6</sup>, Wu Lihua <sup>7</sup> and Minhaj Uddin Monir <sup>8</sup>

- <sup>1</sup> Faculty of Civil Engineering Technology, Universiti Malaysia Pahang, Gambang 26300, Pahang, Malaysia; arifhossen0101@cuet.ac.bd (M.A.H.); lubna.pme71@gmail.com (F.K.); aaminapathan.energy@gmail.com (A.D.M.)
- <sup>2</sup> Center for Environmental Science & Engineering Research, Chittagong University of Engineering and Technology, Chattogram 4349, Bangladesh
- <sup>3</sup> Department of Analysis and Quality Control, Sarir Oil Refinery, Arabian Gulf Oil Company, Benghazi P.O. Box 263, Libya; riyadhkriedeeh@gmail.com
- <sup>4</sup> Chemical Reaction Engineering Group (CREG), School of Chemical and Energy Engineering, Universiti Teknologi Malaysia (UTM), Johor Bahru 81310, Johor, Malaysia
- <sup>5</sup> Department of Environmental Engineering, Faculty of Engineering and Green Technology, Universiti Tunku Abdul Rahman, Kampar 31900, Perak, Malaysia
- <sup>6</sup> Department of Chemical Engineering, Lee Kong Chian Faculty of Engineering and Science, Universiti Tunku Abdul Rahman, Kajang 43200, Selangor, Malaysia; simcl@utar.edu.my
- <sup>7</sup> Kuantan Sunny Scientific Collaboration Sdn. Bhd. Suites 7.23, 7th Floor, Imbi Plaza, Jalan Imbi, Kuala Lumpur 55100, Kuala Lumpur, Malaysia; wulihua217@gmail.com
- <sup>8</sup> Department of Petroleum and Mining Engineering, Jashore University of Science and Technology, Jashore 7408, Bangladesh; monir\_pme@just.edu.bd
- \* Correspondence: azrinaaziz@ump.edu.my (A.A.A.); khleong@utar.edu.my (K.H.L.)

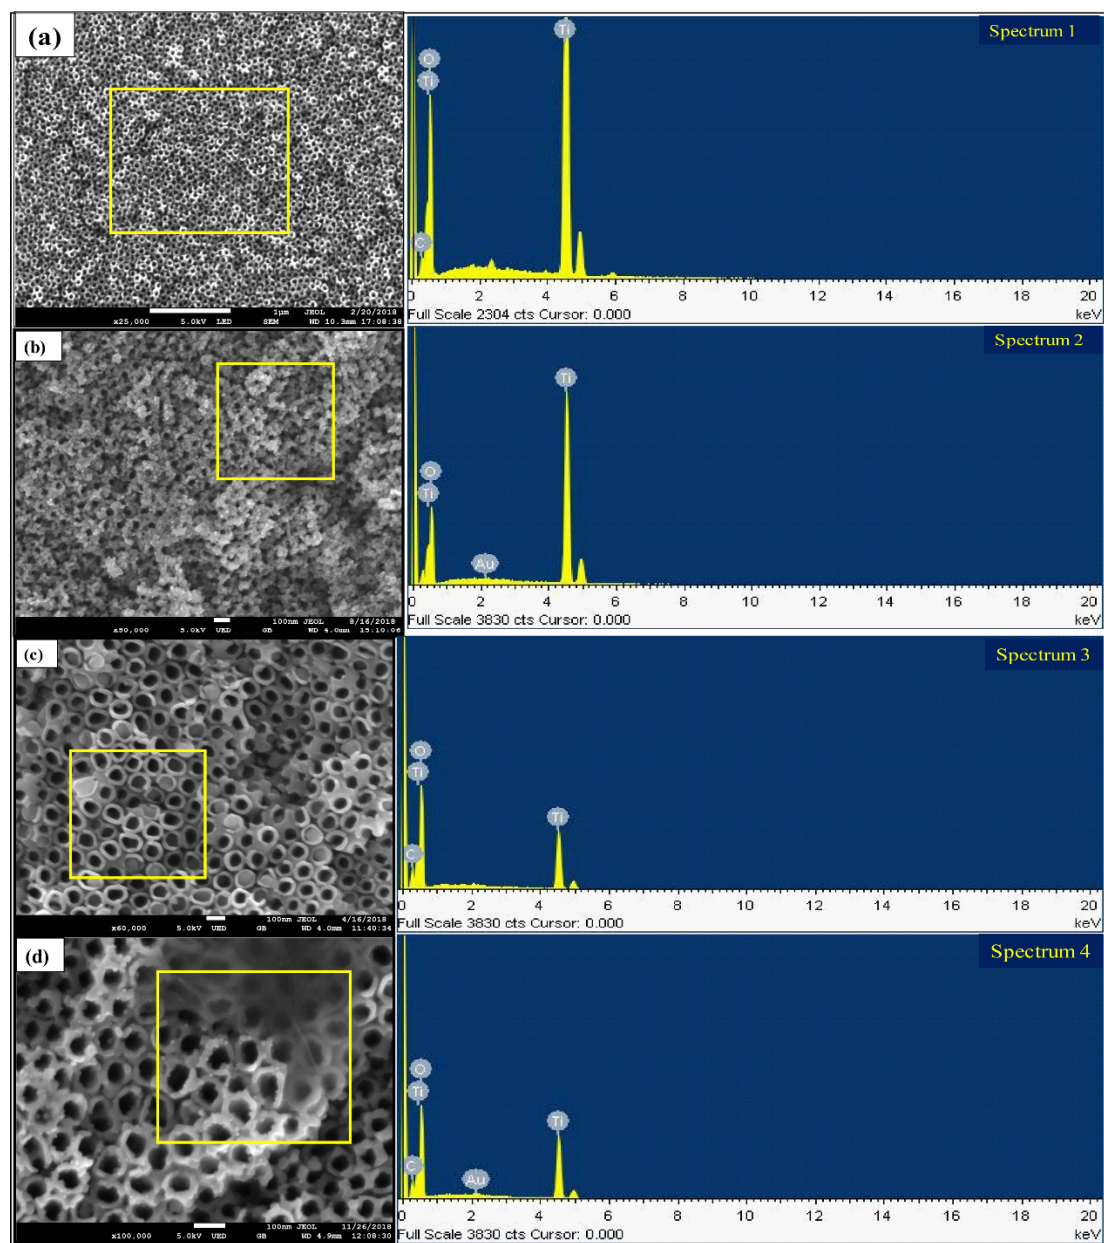

**Figure S1.** EDX of (a) TNTAs, (b) Au-TNTAs, (c) RGO-TNTAs and (d) RGO/Au-TNTAs.

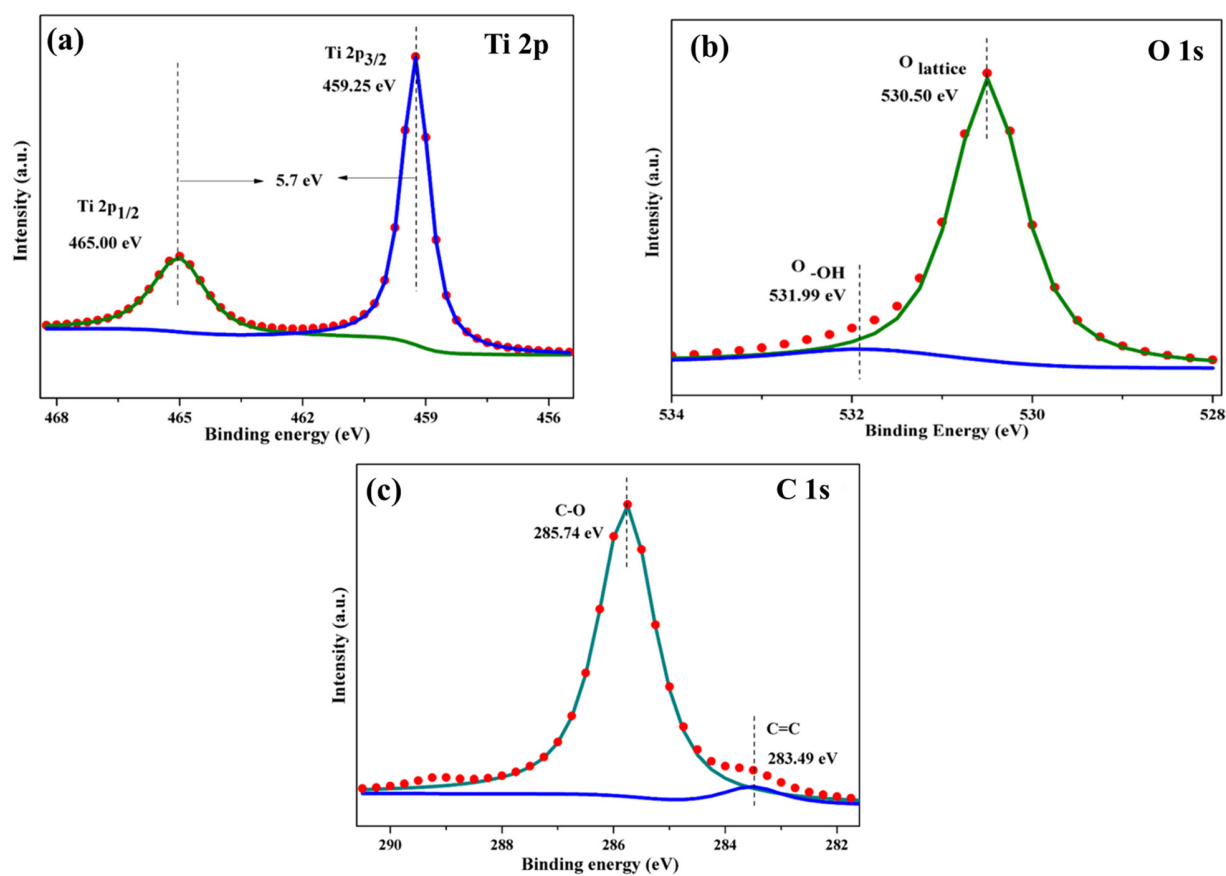

**Figure S2.** Core level XPS spectra of TNTAs (a) Ti 2p, (b) O 1s and (c) C 1s.

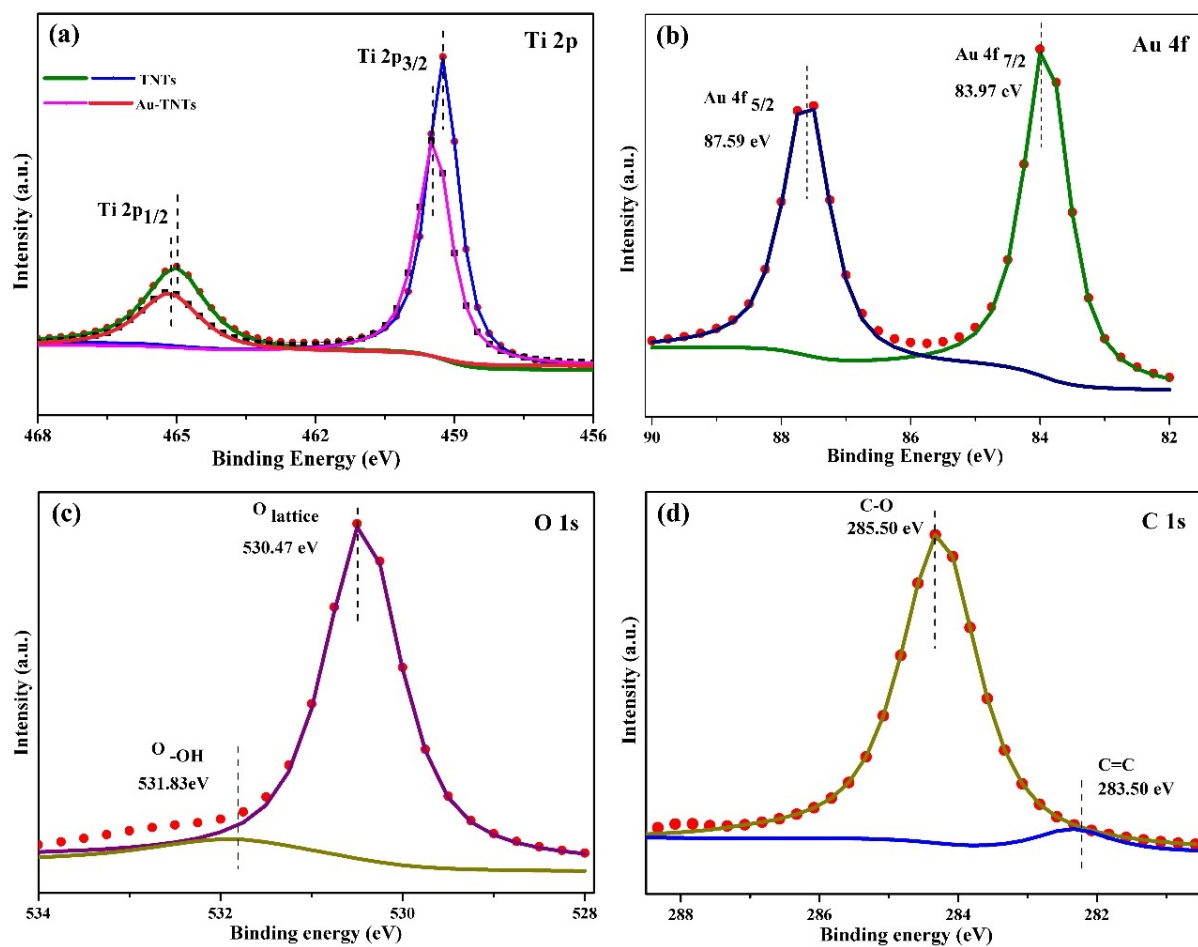

**Figure S3.** XPS spectra of Au-TNTAs (a) Ti 2p of TNTs and Au-TNTs, (b) Au 4f, (c) O 1s and (d) C 1s.

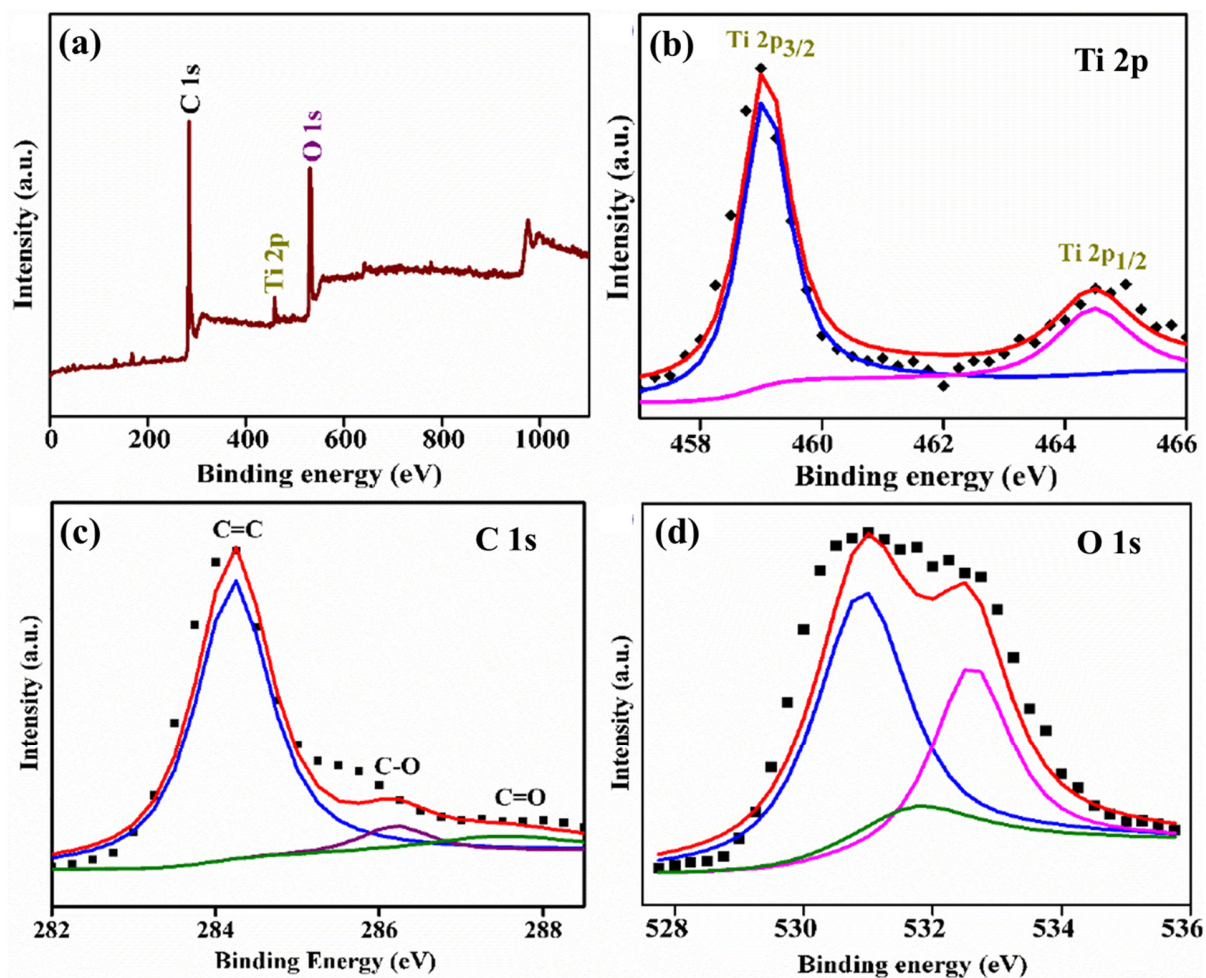

**Figure S4.** XPS spectra of RGO-TNTAs (a) Fully scanned spectra (b) Ti 2p, (c) C 1s and (d) O 1s.

### Quantification of Bandgap of Synthesized Photocatalysts

The bandgap energies were estimated by using the Tauc equation (Equation (S1)).

$$(\alpha h\nu)^2 = A (h\nu - E_g) \quad (S1)$$

where  $\alpha$  is the absorption coefficient,  $h\nu$  is the photon energy,  $A$  is the absorption constant, and  $E_g$  is the energy band gap. By plotting the values of  $(\alpha h\nu)^2$  versus the photon energy values ( $h\nu$ ) the band gap energies of different synthesized photocatalysts were estimated.

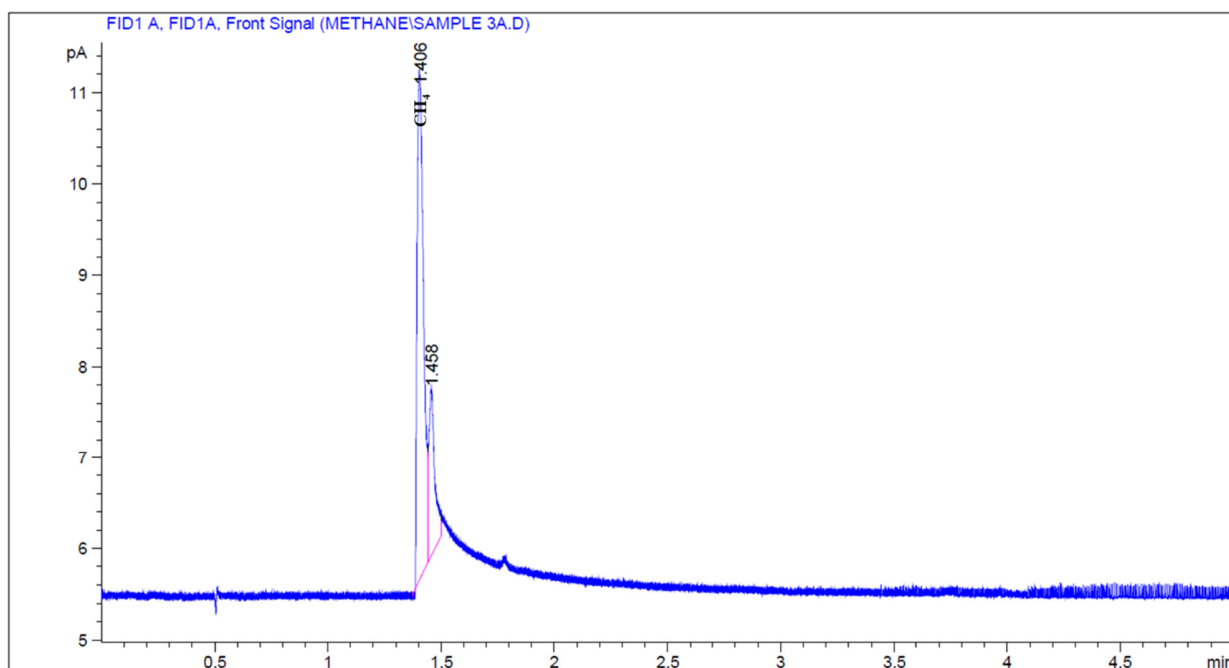

**Figure S5.** Chromatograms of hydrocarbon fuels generation using RGO/Au-TNTAs as photocatalyst over a period of 4 h of light irradiation. (Detector: FID/Methanizer)

**Table S1:** Rate of CH<sub>4</sub> production at different irradiation time.

| Catalysts    | CH <sub>4</sub> production at every 1h irradiation time (ppm cm <sup>-2</sup> h <sup>-1</sup> ) |             |             |              | Total CH <sub>4</sub> production (ppm cm <sup>-2</sup> ) |
|--------------|-------------------------------------------------------------------------------------------------|-------------|-------------|--------------|----------------------------------------------------------|
|              | 1h                                                                                              | 2h          | 3h          | 4h           |                                                          |
| TNTAs        | 0.72 ± 0.37                                                                                     | 1.04 ± 0.56 | 1.24 ± 1.03 | 1.02 ± 0.67  | 4.02 ± 1.02                                              |
| Au-TNTAs     | 3.42 ± 0.33                                                                                     | 4.05 ± 0.55 | 6.02 ± 0.56 | 8.15 ± 1.02  | 21.64 ± 2.34                                             |
| RGO-TNTAs    | 1.82 ± 0.32                                                                                     | 2.21 ± 0.61 | 4.41 ± 0.83 | 4.02 ± 0.72  | 12.46 ± 3.40                                             |
| RGO/Au-TNTAs | 7.33 ± 0.46                                                                                     | 7.92 ± 0.64 | 9.26 ± 1.06 | 10.62 ± 0.88 | 35.13 ± 2.33                                             |

Note: Number of of repeated experiments, n = 05
